# Supplementary material for: Seven-transmembrane receptor protein RgsP and cell wall-binding protein RgsM promote unipolar growth in Rhizobiales
Source: PubMed Central journal article supplement (PMC6107284; doi:10.1371/journal.pgen.1007594), 2018-08-13
Supplement: pgen.1007594.s019.pdf [file pgen.1007594.s019.pdf]

**S1 Table. Co-immunoprecipitation revealed putative interaction partners of RgsP (SMc00074).**

| Accession       | Description                                                    | Coverage | Unique Peptides | Peptides | PSMs | AAs | MW [kDa] |
|-----------------|----------------------------------------------------------------|----------|-----------------|----------|------|-----|----------|
| 15964671        | transmembrane signal peptide protein SMc00074 (RgsP)           | 36.29    | 22              | 27       | 42   | 970 | 107.2    |
| 15966360        | hypothetical protein SMc02432 (RgsM)                           | 54.64    | 18              | 22       | 25   | 646 | 69.7     |
| 15966480        | hypothetical protein SMc00644                                  | 26.16    | 8               | 10       | 12   | 753 | 80.0     |
| 15964167        | small heat shock protein                                       | 67.83    | 5               | 6        | 9    | 143 | 15.9     |
| 15965540;Q92PG9 | 30S ribosomal protein S4                                       | 36.59    | 5               | 5        | 9    | 205 | 23.5     |
| 15965409;Q92PS4 | glucosamine--fructose-6-phosphate aminotransferase             | 23.36    | 5               | 8        | 14   | 608 | 65.8     |
| 15965119;Q92QG0 | 50S ribosomal protein L14                                      | 47.54    | 4               | 5        | 8    | 122 | 13.4     |
| 15965121;Q92QF8 | 50S ribosomal protein L5                                       | 32.43    | 4               | 4        | 8    | 185 | 20.9     |
| 2580515         | citrate synthase                                               | 28.44    | 4               | 8        | 12   | 429 | 47.9     |
| 15965337        | peptidyl-prolyl cis-trans isomerase B protein                  | 38.46    | 3               | 4        | 5    | 169 | 18.6     |
| 15965395        | signal peptide protein                                         | 33.01    | 3               | 5        | 6    | 209 | 22.5     |
| 15965248;Q92Q55 | 30S ribosomal protein S2                                       | 22.75    | 3               | 4        | 6    | 255 | 28.0     |
| 15965112;Q92QG7 | 50S ribosomal protein L2                                       | 22.66    | 3               | 3        | 8    | 278 | 30.4     |
| 15963759;Q92TE7 | preprotein translocase subunit SecB                            | 35.12    | 2               | 3        | 9    | 168 | 18.3     |
| 15965567        | ferredoxin, 2FE-2S FDII electron transport iron-sulfur protein | 30.19    | 2               | 2        | 2    | 106 | 11.4     |
| 15965311;P56898 | single-stranded DNA-binding protein                            | 26.44    | 2               | 3        | 5    | 174 | 19.0     |
| 15965105;Q92QH3 | 30S ribosomal protein S7                                       | 25.64    | 2               | 2        | 7    | 156 | 17.7     |
| 334320817       | heat shock protein Hsp20                                       | 21.38    | 2               | 2        | 2    | 159 | 17.8     |
| 15965096        | transcription antitermination protein NusG                     | 37.50    | 1               | 3        | 4    | 176 | 19.9     |
| 15964367        | translation initiation factor IF-1                             | 30.56    | 1               | 1        | 1    | 72  | 8.3      |
| 15965730        | dimethylamine corrinoid protein                                | 25.00    | 1               | 2        | 2    | 232 | 25.5     |
| 15963996;Q92SW1 | 30S ribosomal protein S15                                      | 24.72    | 1               | 1        | 4    | 89  | 10.1     |
| 15966770        | ABC transporter ATP-binding protein                            | 24.72    | 1               | 4        | 4    | 356 | 39.7     |
| 8571395         | NifU-like protein                                              | 23.81    | 1               | 1        | 1    | 63  | 6.7      |
| 334319033       | electron transfer flavoprotein subunit alpha                   | 23.46    | 1               | 7        | 8    | 567 | 59.4     |
| 384533786       | hypothetical protein                                           | 22.61    | 1               | 2        | 2    | 261 | 29.3     |
| 8133104         | NADP-dependent isocitrate dehydrogenase                        | 21.78    | 1               | 4        | 4    | 404 | 45.2     |
| 15963984;Q92SX1 | hypothetical protein SMc02906                                  | 21.50    | 1               | 1        | 2    | 107 | 11.6     |
