# Supplementary material for: Seven-transmembrane receptor protein RgsP and cell wall-binding protein RgsM promote unipolar growth in Rhizobiales
Source: PubMed Central journal article supplement (PMC6107284; doi:10.1371/journal.pgen.1007594), 2018-08-13
Supplement: pgen.1007594.s020.pdf [file pgen.1007594.s020.pdf]

**S2 Table. Co-immunoprecipitation revealed putative interaction partners of RgsM (SMc02432).**

| Accession      | Description                                                  | Coverage | Unique Peptides | Peptides | PSMs | AAs | MW [kDa] |
|----------------|--------------------------------------------------------------|----------|-----------------|----------|------|-----|----------|
| NP_386713.1    | hypothetical protein SMc02432 (RgsM)                         | 57.28    | 23              | 23       | 62   | 646 | 69.7     |
| NP_385024.1    | transmembrane signal peptide protein SMc00074 (RgsP)         | 17.11    | 11              | 11       | 11   | 970 | 107.2    |
| NP_386833.1    | hypothetical protein SMc00644                                | 31.08    | 11              | 11       | 11   | 753 | 80.0     |
| NP_385532.1    | hypothetical protein SMc01011                                | 15.41    | 4               | 4        | 4    | 331 | 34.8     |
| NP_385748.1    | signal peptide protein SMc00950                              | 11.48    | 2               | 2        | 2    | 209 | 22.5     |
| NP_385925.1    | ubiquinol-cytochrome C reductase iron-sulfur subunit protein | 7.81     | 1               | 1        | 1    | 192 | 20.5     |
| YP_002122333.1 | molecular chaperone GroES (plasmid)                          | 15.38    | 1               | 1        | 1    | 104 | 11.4     |
| NP_385964.1    | hypothetical protein SMc00150                                | 0.95     | 1               | 1        | 1    | 631 | 69.5     |
| NP_387388.1    | hypothetical protein SMc03899                                | 30.12    | 1               | 1        | 1    | 83  | 9.8      |
| NP_435918.1    | NapC membrane-bound tetraheme cytochrome c subunit (plasmid) | 10.73    | 1               | 1        | 1    | 233 | 26.1     |
| NP_384173.1    | ATP-dependent helicase                                       | 4.76     | 1               | 1        | 1    | 820 | 88.5     |
| NP_435823.1    | hypothetical protein SMa1065 (plasmid)                       | 8.02     | 1               | 1        | 1    | 262 | 27.9     |
| NP_437769.1    | hypothetical protein SM_b21402 (plasmid)                     | 11.63    | 1               | 1        | 2    | 387 | 39.1     |
| NP_386896.1    | hypothetical protein SMc04006                                | 7.59     | 1               | 1        | 1    | 145 | 16.0     |
| NP_386684.1    | hypothetical protein SMc02351                                | 18.06    | 1               | 1        | 1    | 155 | 17.1     |
| NP_385170.1    | DNA-directed RNA polymerase subunit omega                    | 29.63    | 1               | 1        | 1    | 135 | 14.9     |
| NP_386284.1    | UDP-N-acetylmuramoyl-L-alanyl-D-glutamate synthetase         | 6.91     | 1               | 1        | 2    | 463 | 48.0     |
