# Supplementary material for: Seven-transmembrane receptor protein RgsP and cell wall-binding protein RgsM promote unipolar growth in Rhizobiales
Source: PubMed Central journal article supplement (PMC6107284; doi:10.1371/journal.pgen.1007594), 2018-08-13
Supplement: pgen.1007594.s021.pdf [file pgen.1007594.s021.pdf]

**S3 Table. RgsP and RgsM are mainly conserved in related species from the order Rhizobiales.**

|          | Phylum                 | BLASTP hits*     |                                     | Representative species      | Sequence identity (%) |                                      | Protein length (#aa)                      |      | Signature motifs |      | Locus              |                    |                 |                |                |
|----------|------------------------|------------------|-------------------------------------|-----------------------------|-----------------------|--------------------------------------|-------------------------------------------|------|------------------|------|--------------------|--------------------|-----------------|----------------|----------------|
|          |                        | RgsP             | RgsM                                |                             | RgsP                  | RgsM                                 | RgsP                                      | RgsM | RgsP             | RgsM |                    |                    |                 |                |                |
|          |                        |                  |                                     |                             |                       |                                      |                                           |      |                  |      |                    |                    |                 |                |                |
| Bacteria | Gram-negative bacteria | α-proteobacteria | Rhizobiales                         | Rhizobiaceae                |                       |                                      |                                           |      |                  |      |                    |                    |                 |                |                |
|          |                        |                  |                                     | Sinorhizobium (taxid:28105) | 41                    | 34                                   | <i>Sinorhizobium meliloti</i> Rm2011      | 100  | 100              | 970  | 646                | RxxD...GGDQF...EAL | HxxxD...H...HxH | WP_010968917.1 | WP_010970071.1 |
|          |                        |                  |                                     |                             |                       |                                      | <i>Sinorhizobium medicae</i> WSM419       | 97   | 96               | 970  | 646                | RxxD...GGDQF...EAL | HxxxD...H...HxH | YP_001326224.1 | YP_001328163.1 |
|          |                        |                  |                                     |                             |                       |                                      | <i>Sinorhizobium fredii</i> HH103         | 95   | 88               | 970  | 651                | RxxD...GGDQF...EAL | HxxxD...H...HxH | WP_014327607.1 | WP_014329503.1 |
|          |                        |                  |                                     |                             |                       |                                      | <i>Rhizobium etli</i> CFN42               | 80   | 70               | 970  | 640                | KxxD...AGDQF...EAL | HxxxD...H...HxH | WP_042118012.1 | ABC92501.1     |
|          |                        |                  |                                     |                             |                       |                                      | <i>Agrobacterium tumefaciens</i> C58      | 78   | 65               | 971  | 648                | KxxD...GGDEF...EAL | HxxxD...H...HxH | WP_006309835.1 | NP_356470.1    |
|          |                        |                  |                                     |                             |                       |                                      | <i>Mesorhizobium loti</i> MAFF303099      | 64   | 53               | 962  | 680                | KxxD...AGDQF...EAL | HxxxD...H...HxH | WP_032929377.1 | WP_080511860.1 |
|          |                        |                  |                                     |                             |                       |                                      | <i>Brucella abortus</i> 104M              | 63   | 52               | 964  | 651                | KxxD...SSDQF...EAL | HxxxD...H...HxH | WP_054173960.1 | ALF30205.1     |
|          |                        |                  |                                     |                             |                       |                                      | <i>Bartonella henselae</i> str. Houston-1 | 50   | 42               | 961  | 668                | NxxD...SADRF...ETI | HxxxD...H...HxH | WP_011180379.1 | PNM38919.1     |
|          |                        |                  |                                     |                             |                       |                                      | <i>Methylobacterium nodulans</i> ORS 2060 | 54   | 34               | 959  | 681                | RxxD...AGDEL...EAL | HxxxD...H...HxH | WP_015927027.1 | WP_015932251.1 |
|          |                        |                  |                                     |                             |                       |                                      | <i>Bradyrhizobium japonicum</i> USDA110   | 56   | 34               | 958  | 684                | KxxD...AGDQF...EAL | HxxxD...H...HxH | AND87158.1     | AND87069.1     |
|          |                        |                  |                                     |                             |                       |                                      | <i>Azorhizobium caulinodans</i> ORS 571   | 52   | 37               | 965  | 673                | KxxD...SGDQF...EAF | HxxxD...H...HxH | WP_012169020.1 | BAF90194.1     |
|          |                        |                  |                                     |                             |                       |                                      | <i>Rhodopseudomonas palustris</i> TIE-1   | 56   | 36               | 959  | 676                | KxxD...AGDQF...EAL | HxxxD...H...HxH | WP_011156449.1 | WP_011159965.1 |
|          |                        |                  |                                     |                             |                       |                                      | <i>Hyphomicrobium zavarzinii</i>          | 41   | 32               | 1290 | 680                | GxxD...SGDRF...EAV | HxxxD...H...HxH | WP_020084480.1 | WP_020084044.1 |
|          |                        |                  |                                     |                             |                       |                                      | <i>Labrenzia suaetae</i> DSM 22153        | 57   | 39               | 969  | 657                | GxxD...NGDQY...EVL | HxxxD...H...HxH | WP_073010793.1 | WP_073014857.1 |
|          |                        |                  |                                     |                             |                       |                                      | Caulobacterales (taxid:204458)            | 0    | 0                |      |                    |                    |                 |                |                |
|          |                        |                  |                                     |                             |                       |                                      | Rickettsiales (taxid:766)                 | 0    | 0                |      |                    |                    |                 |                |                |
|          |                        |                  |                                     |                             |                       |                                      | Sphingomonadales (taxid:204457)           | 0    | 0                |      |                    |                    |                 |                |                |
|          |                        |                  |                                     |                             |                       |                                      | Rhodospirillales (taxid:204441)           | 0    | 0                |      |                    |                    |                 |                |                |
|          |                        |                  |                                     |                             |                       |                                      | Pelagibacterales (taxid:54526)            | 0    | 0                |      |                    |                    |                 |                |                |
|          |                        |                  | Holosporales (taxid:1921002)        | 0                           | 0                     |                                      |                                           |      |                  |      |                    |                    |                 |                |                |
|          |                        |                  | Betaproteobacteria (taxid:28216)    | 0                           | 0                     |                                      |                                           |      |                  |      |                    |                    |                 |                |                |
|          |                        |                  | Gammaproteobacteria (taxid:1236)    | 1                           | 1                     | <i>Pseudomonas bauzanensis</i> W13Z2 | 63                                        | 53   | 968              | 655  | KxxD...AGDQF...EAL | HxxxD...H...HxH    | EZQ16934.1      | EZQ14393.1     |                |
|          |                        |                  | Deltaproteobacteria (taxid:28221)   | 0                           | 0                     |                                      |                                           |      |                  |      |                    |                    |                 |                |                |
|          |                        |                  | Gram-positive bacteria (taxid:1239) | 0                           | 0                     |                                      |                                           |      |                  |      |                    |                    |                 |                |                |
