# Supplementary material for: Seven-transmembrane receptor protein RgsP and cell wall-binding protein RgsM promote unipolar growth in Rhizobiales
Source: PubMed Central journal article supplement (PMC6107284; doi:10.1371/journal.pgen.1007594), 2018-08-13
Supplement: pgen.1007594.s022.pdf [file pgen.1007594.s022.pdf]

**S4 Table. Names and mass spectrometry data for the mucopeptide fractions shown in S15A Fig.**

| <b>Peak No.</b> | <b>Muropeptide<sup>1</sup></b>    | <b>Determined<br/>neutral<br/>mass (amu)</b> | <b>Theoretical<br/>mass<br/>(amu)</b> |
|-----------------|-----------------------------------|----------------------------------------------|---------------------------------------|
| 1               | Tri                               | 870.36                                       | 870.37                                |
| 2               | TetraGly4                         | 927.40                                       | 927.39                                |
| 3               | Tetra                             | 941.41                                       | 941.41                                |
| 4               | Penta                             | 1012.45                                      | 1012.44                               |
| 5               | TetraTriDapGly4                   | 1779.76                                      | 1779.75                               |
| 6               | TriTriDap                         | 1722.75                                      | 1722.73                               |
| 7               | TetraTriDap                       | 1793.79                                      | 1779.75                               |
| 8               | TetraTri                          | 1793.78                                      | 1779.75                               |
| 9               | TetraTetra                        | 1864.82                                      | 1864.80                               |
| 10              | TetraAnh                          | 921.39                                       | 921.38                                |
| 11              | TetraPenta                        | 1935.86                                      | 1935.84                               |
| 12              | TetraTetraTriDap                  | 2717.18                                      | 2717.16                               |
| 13              | PentaAnh                          | 992.42                                       | 992.42                                |
| 14              | TetraTetraTri                     | 2717.18                                      | 2717.16                               |
| 15              | TriTriDapAnh +<br>TetraTetraTetra | 1702.71<br>2788.21                           | 1702.70<br>2788.20                    |
| 16              | TetraTriDapAnh<br>or TetraTriAnh  | 1773.75<br>1773.75                           | 1773.74<br>1773.74                    |
| 17              | TetraTetraAnh                     | 1844.79                                      | 1844.78                               |

<sup>1</sup>Muropeptides are named according to ref. 81.
