# Supplementary material for: Seven-transmembrane receptor protein RgsP and cell wall-binding protein RgsM promote unipolar growth in Rhizobiales
Source: PubMed Central journal article supplement (PMC6107284; doi:10.1371/journal.pgen.1007594), 2018-08-13
Supplement: pgen.1007594.s023.pdf [file pgen.1007594.s023.pdf]

**S5 Table.** Strains and plasmids used in this study.

| Strain                                                   | Properties                                                                                                                                                                                                                             | Reference           |
|----------------------------------------------------------|----------------------------------------------------------------------------------------------------------------------------------------------------------------------------------------------------------------------------------------|---------------------|
| <b><i>S. meliloti</i></b>                                |                                                                                                                                                                                                                                        |                     |
| Rm2011                                                   | Wild type, Str <sup>r</sup>                                                                                                                                                                                                            | [1]                 |
| Rm2011 ΔXVI                                              | Rm2011 with 16 deletions of GGDEF domain-encoding genes, c-di-GMP <sup>0</sup>                                                                                                                                                         | [2]                 |
| Rm2011 <i>P<sub>lac-T5</sub>-rgsP</i>                    | Rm2011 <i>rgsP</i> ::pK18mob2- <i>P<sub>lac-T5</sub>-rgsP</i> , conditional RgsP depletion upon <i>lacI</i> expression (yields strain Rm2011 <i>rgsP<sup>dpl</sup></i> ), Km <sup>r</sup>                                              | This work           |
| Rm2011 ΔXVI <i>P<sub>lac-T5</sub>-rgsP</i>               | Rm2011 ΔXVI <i>rgsP</i> ::pK18mob2- <i>P<sub>lac-T5</sub>-rgsP</i> , conditional RgsP depletion upon <i>lacI</i> expression (yields strain Rm2011 ΔXVI <i>rgsP<sup>dpl</sup></i> ), Km <sup>r</sup>                                    | This work           |
| Rm2011 <i>P<sub>lac</sub>-rgsM</i>                       | Rm2011 <i>rgsM</i> ::pK18mob2- <i>P<sub>lac</sub>-rgsM</i> , conditional RgsM depletion upon <i>lacI</i> expression (yields strain Rm2011 <i>rgsM<sup>dpl</sup></i> ), Km <sup>r</sup>                                                 | This work           |
| Rm2011 <i>rgsP-egfp</i>                                  | Rm2011 expressing <i>egfp</i> -tagged <i>rgsP</i> , markerless insertion                                                                                                                                                               | This work           |
| Rm2011 <i>rgsP-mCherry</i>                               | Rm2011 expressing <i>mCherry</i> -tagged <i>rgsP</i> , markerless insertion                                                                                                                                                            | This work           |
| Rm2011 <i>rgsP-mCherry pleD-egfp</i>                     | Rm2011 <i>rgsP-mCherry pleD</i> ::pK18mob2- <i>pleD-egfp</i> , Km <sup>r</sup>                                                                                                                                                         | This work           |
| Rm2011 <i>rgsP-egfp<sub>Km</sub></i>                     | Rm2011 <i>rgsP</i> ::pK18mob2- <i>rgsP-egfp</i> , Km <sup>r</sup>                                                                                                                                                                      | This work           |
| Rm2011 ΔXVI <i>rgsP-egfp<sub>Km</sub></i>                | Rm2011 ΔXVI <i>rgsP</i> ::pK18mob2- <i>rgsP-egfp</i> , Km <sup>r</sup>                                                                                                                                                                 | This work           |
| Rm2011 <i>rgsP-3×flag</i>                                | Rm2011 <i>rgsP</i> ::pG18mob- <i>rgsP-3×flag</i> , Gm <sup>r</sup>                                                                                                                                                                     | This work           |
| Rm2011 <i>rgsM-3×flag</i>                                | Rm2011 <i>rgsM</i> ::pG18mob- <i>rgsM-3×flag</i> , Gm <sup>r</sup>                                                                                                                                                                     | This work           |
| Rm2011 <i>3×flag-mucR</i>                                | Rm2011 expressing <i>3×flag</i> -tagged <i>mucR</i> , markerless insertion                                                                                                                                                             | This work           |
| Rm2011 <i>3×flag-mucR P<sub>lac-T5</sub>-rgsP</i>        | Rm2011 <i>3×flag-mucR rgsP</i> ::pK18mob2- <i>P<sub>lac-T5</sub>-rgsP</i> , conditional RgsP depletion upon <i>lacI</i> expression (yields strain Rm2011 <i>3×flag-mucR rgsP<sup>dpl</sup></i> ), Km <sup>r</sup>                      | This work           |
| Rm2011 <i>3×flag-mucR rgsP-3×flag</i>                    | Rm2011 <i>3×flag-mucR</i> expressing <i>3×flag</i> -tagged <i>rgsP</i> , markerless insertion                                                                                                                                          | This work           |
| Rm2011 <i>3×flag-mucR rgsM-3×flag</i>                    | Rm2011 <i>3×flag-mucR</i> expressing <i>3×flag</i> -tagged <i>rgsM</i> , markerless insertion                                                                                                                                          | This work           |
| Rm2011 <i>3×flag-mucR P<sub>lac-T5</sub>-rgsP-3×flag</i> | Rm2011 <i>3×flag-mucR rgsP-3×flag</i> ::pK18mob2- <i>P<sub>lac-T5</sub>-rgsP</i> , conditional RgsP-3×FLAG depletion upon <i>lacI</i> expression (yields strain Rm2011 <i>3×flag-mucR rgsP-3×flag<sup>dpl</sup></i> ), Km <sup>r</sup> | This work           |
| Rm2011 <i>3×flag-mucR P<sub>lac</sub>-rgsM-3×flag</i>    | Rm2011 <i>3×flag-mucR rgsM-3×flag</i> ::pK18mob2- <i>P<sub>lac</sub>-rgsM</i> , conditional RgsM-3×FLAG depletion upon <i>lacI</i> expression (yields strain Rm2011 <i>3×flag-mucR rgsM-3×flag<sup>dpl</sup></i> ), Km <sup>r</sup>    | This work           |
| Rm2011 <i>mVenus-rgsM</i>                                | Rm2011 expressing <i>mVenus</i> -tagged <i>rgsM</i> , markerless insertion                                                                                                                                                             | This work           |
| Rm2011 <i>mVenus-rgsM rgsP-mCherry</i>                   | Rm2011 <i>mVenus-rgsM</i> expressing <i>mCherry</i> -tagged <i>rgsP</i> , markerless insertion                                                                                                                                         | This work           |
| Rm2011 <i>mVenus-rgsM P<sub>lac-T5</sub>-rgsP</i>        | Rm2011 <i>mVenus-rgsM rgsP</i> ::pK18mob2- <i>P<sub>lac-T5</sub>-rgsP</i> , conditional RgsP depletion upon <i>lacI</i> expression (yields strain Rm2011 <i>mVenus-rgsM rgsP<sup>dpl</sup></i> ), Km <sup>r</sup>                      | This work           |
| Rm2011 <i>rgsP-mCherry P<sub>lac</sub>-rgsM</i>          | Rm2011 <i>rgsP-mCherry rgsM</i> ::pK18mob2- <i>P<sub>lac</sub>-rgsM</i> , conditional RgsM depletion upon <i>lacI</i> expression (yields strain Rm2011 <i>rgsP-mCherry rgsM<sup>dpl</sup></i> ), Km <sup>r</sup>                       | This work           |
| <b><i>A. tumefaciens</i></b>                             |                                                                                                                                                                                                                                        |                     |
| C58                                                      | Wild type, isolated from a cherry tree ( <i>Prunus</i> ) tumor                                                                                                                                                                         | [3]                 |
| C58 <i>Atu0784-egfp</i>                                  | C58 <i>Atu0784</i> ::pK18mob2- <i>rgsP<sub>At</sub>-egfp</i> , Km <sup>r</sup>                                                                                                                                                         | This work           |
| <b><i>R. etli</i></b>                                    |                                                                                                                                                                                                                                        |                     |
| CFN42                                                    | <i>R. etli</i> type strain, isolated from <i>Phaseolus</i> , Sm <sup>r</sup>                                                                                                                                                           | [4]                 |
| CFN42 <i>RHE_CH00976-egfp</i>                            | CFN42 <i>RHE_CH00976</i> ::pK18mob2- <i>rgsP<sub>Re</sub>-egfp</i> , Km <sup>r</sup>                                                                                                                                                   | This work           |
| <b><i>E. coli</i></b>                                    |                                                                                                                                                                                                                                        |                     |
| BL21(DE3)                                                | F <sup>-</sup> <i>ompT gal dcm lon hsdS<sub>B</sub>(r<sub>B</sub><sup>-</sup>m<sub>B</sub><sup>-</sup>) λ(DE3 [<i>lacI lacUV5-T7p07 ind1 sam7 nin5</i>]) [<i>malB</i><sup>+</sup>]<sub>K-12</sub>(λ<sup>S</sup>)</i>                   | New England Biolabs |
| DH5α                                                     | F <sup>-</sup> <i>endA1 glnV44 thi-1 recA1 relA1 gyrA96 deoR nupG purB20 φ80dlacZΔM15 Δ(lacZYA-argF)U169, hsdR17(r<sub>K</sub><sup>-</sup>m<sub>K</sub><sup>+</sup>)</i> , λ-                                                          | [5]                 |
| S17-1                                                    | <i>E. coli</i> 294 Thi RP4-2-Tc::Mu-Km::Tn7 integrated into the chromosome                                                                                                                                                             | [6]                 |
| BTH101                                                   | <i>cya</i> , BACTH reporter strain                                                                                                                                                                                                     | [7]                 |
| <b>Plasmids</b>                                          |                                                                                                                                                                                                                                        |                     |
| pABC2S-mob                                               | variant of mobilizable <i>repABC</i> -based mini-replicon, single-copy in <i>S. meliloti</i> , Spec <sup>r</sup>                                                                                                                       | [8]                 |
| pG18mob                                                  | suicide vector, <i>lacZ, mob</i> , Gm <sup>r</sup>                                                                                                                                                                                     | [9]                 |
| pK18mob2                                                 | suicide vector, <i>lacZ, mob</i> , Km <sup>r</sup>                                                                                                                                                                                     | [9]                 |
| pK18mob2- <i>egfp</i>                                    | pK18mob2 carrying <i>egfp, lacZ, mob</i> , Km <sup>r</sup>                                                                                                                                                                             | N. Meier            |
| pK18mobsacB                                              | suicide vector, <i>lacZ, mob, sacB</i> , Km <sup>r</sup>                                                                                                                                                                               | [9]                 |
| pK19mob2ΩHMB                                             | integrative plasmid carrying a transcription-termination sequence, Km <sup>r</sup>                                                                                                                                                     | [10]                |
| pR- <i>egfp</i>                                          | reporter fusion plasmid carrying <i>P<sub>syn</sub></i> for constitutive expression, Tc <sup>r</sup>                                                                                                                                   | [11]                |
| pR- <i>P<sub>tau</sub></i>                               | pR- <i>egfp</i> carrying the <i>tauA</i> promoter from <i>S. meliloti</i> in place of <i>P<sub>syn</sub></i> , Tc <sup>r</sup>                                                                                                         | M. Robledo          |
| pSRKGm                                                   | pBBR1MCS-5-derived broad-host-range expression vector containing <i>lac</i> promoter and <i>lacI<sup>q</sup>, lacZα<sup>+</sup></i> , Gm <sup>r</sup>                                                                                  | [12]                |
| pSRKGm- <i>parB-mCherry</i>                              | pSRKGm carrying <i>S. meliloti parB</i> fused to <i>mCherry</i> , Gm <sup>r</sup>                                                                                                                                                      | [2]                 |
| pSRKKm                                                   | pBBR1MCS-5-derived broad-host-range expression vector containing <i>lac</i>                                                                                                                                                            | [12]                |

|                                                                         |                                                                                                                           |             |
|-------------------------------------------------------------------------|---------------------------------------------------------------------------------------------------------------------------|-------------|
| pSRKKm- <i>egfp</i>                                                     | promoter and <i>lacI<sup>q</sup></i> , <i>lacZα<sup>+</sup></i> , Km <sup>r</sup>                                         |             |
| pWBT                                                                    | pSRKKm carrying <i>egfp</i> , Km <sup>r</sup>                                                                             | [2]         |
| pWH844                                                                  | pSRKGm carrying T5 promoter, Gm <sup>r</sup>                                                                              | M. McIntosh |
| pKT25                                                                   | expression vector carrying <i>6×his</i> and T5 promoter, Amp <sup>r</sup>                                                 | [13]        |
| pUT18                                                                   | Plasmid for constructing C-terminal fusions to T25, Km <sup>r</sup>                                                       | [7]         |
| pUT18C                                                                  | Plasmid for constructing N-terminal fusions to T18, Amp <sup>r</sup>                                                      | [7]         |
| pUT18C- <i>zip</i>                                                      | Plasmid for constructing C-terminal fusions to T18, Amp <sup>r</sup>                                                      | [7]         |
| pKT25- <i>zip</i>                                                       | pUT18C carrying the leucine zipper of GCN4                                                                                | [7]         |
| pG18mob- <i>3×flag</i>                                                  | pKT25 carrying the leucine zipper of GCN4                                                                                 | [7]         |
|                                                                         | pG18mob carrying <i>3×flag</i> including a stop codon cloned into the XbaI and HindIII restriction sites, Gm <sup>r</sup> | This work   |
| pSRKGm- <i>mCherry</i>                                                  | pSRKGm carrying <i>mCherry</i> , Gm <sup>r</sup>                                                                          | This work   |
| pSRKGm- <i>mCherry-ftsZ</i>                                             | pSRKGm carrying <i>S. meliloti ftsZ</i> fused to <i>mCherry</i> , Gm <sup>r</sup>                                         | This work   |
| pSRKKm-P <sub><i>rgsP</i></sub> - <i>egfp</i>                           | pSRKKm- <i>egfp</i> carrying <i>rgsP</i> upstream fragment                                                                | This work   |
| pSRKKm-P <sub><i>rimJ</i></sub> -P <sub><i>rgsP</i></sub> - <i>egfp</i> | pSRKKm- <i>egfp</i> carrying <i>rimJ</i> and <i>rgsP</i> upstream fragment                                                | This work   |
| pUT18Spe                                                                | pUT18 with a SpeI restriction site upstream of T18 start codon                                                            | This work   |
| pUT18Spe- <i>rgsP</i> <sub>ΔGGDEFΔEAL</sub>                             | pUT18Spe carrying <i>rgsP</i> (AA1-524)                                                                                   | This work   |
| pUT18C- <i>rgsM</i>                                                     | pUT18C carrying <i>rgsM</i>                                                                                               | This work   |
| pKT25- <i>rgsM</i>                                                      | pKT25 carrying <i>rgsM</i>                                                                                                | This work   |

### Complementation and overexpression constructs

|                                                                          |                                                                                                                                                  |           |
|--------------------------------------------------------------------------|--------------------------------------------------------------------------------------------------------------------------------------------------|-----------|
| pDJS31                                                                   | pET24b(+) carrying <i>dgca</i> <sup>wt</sup> , Km <sup>r</sup>                                                                                   | [14]      |
| pDJS30                                                                   | pET24b(+) carrying <i>dmxB</i> <sup>wt</sup> , Km <sup>r</sup>                                                                                   | [15]      |
| pWBT- <i>SMc00074</i>                                                    | pWBT carrying <i>rgsP</i> ( <i>SMc00074</i> )                                                                                                    | [2]       |
| pWH844- <i>SMc00074</i> <sub>390-970</sub>                               | pWH844 carrying <i>rgsP</i> (AA <sub>390-970</sub> )                                                                                             | [2]       |
| pABC- <i>rgsP</i>                                                        | pABC2S-mob carrying 944 bp <i>rgsP</i> upstream fragment with a stop codon in <i>rimJ</i> at nucleotide position 64, <i>rgsP</i> and <i>egfp</i> | This work |
| pABC- <i>rgsP-egfp</i>                                                   | pABC- <i>rgsP</i> without <i>rgsP</i> stop codon                                                                                                 | This work |
| pABC- <i>rgsP-3×flag</i>                                                 | pABC- <i>rgsP-egfp</i>                                                                                                                           | This work |
| pABC- <i>rgsP</i> <sub>AAL</sub>                                         | pABC- <i>rgsP</i> containing E746A mutation                                                                                                      | This work |
| pABC- <i>rgsP</i> <sub>AAL</sub> - <i>egfp</i>                           | pABC- <i>rgsP</i> <sub>AAL</sub> without <i>rgsP</i> stop codon                                                                                  | This work |
| pABC- <i>rgsP</i> <sub>AAL</sub> - <i>3×flag</i>                         | pABC- <i>rgsP</i> <sub>AAL</sub> - <i>egfp</i> carrying <i>3×flag</i> in place of <i>egfp</i>                                                    | This work |
| pABC- <i>rgsP</i> <sub>GAAAF</sub>                                       | pABC- <i>rgsP</i> containing G619A, D620A and Q621A mutations                                                                                    | This work |
| pABC- <i>rgsP</i> <sub>GAAAF</sub> - <i>egfp</i>                         | pABC- <i>rgsP</i> <sub>GAAAF</sub> without <i>rgsP</i> stop codon                                                                                | This work |
| pABC- <i>rgsP</i> <sub>GAAAF</sub> - <i>3×flag</i>                       | pABC- <i>rgsP</i> <sub>GAAAF</sub> - <i>egfp</i> carrying <i>3×flag</i> in place of <i>egfp</i>                                                  | This work |
| pABC- <i>rgsP</i> <sub>AXXA</sub>                                        | pABC- <i>rgsP</i> R609A and D612A mutations                                                                                                      | This work |
| pABC- <i>rgsP</i> <sub>AXXA</sub> - <i>egfp</i>                          | pABC- <i>rgsP</i> <sub>AXXA</sub> without <i>rgsP</i> stop codon                                                                                 | This work |
| pABC- <i>rgsP</i> <sub>AXXA</sub> - <i>3×flag</i>                        | pABC- <i>rgsP</i> <sub>AXXA</sub> - <i>egfp</i> carrying <i>3×flag</i> in place of <i>egfp</i>                                                   | This work |
| pABC- <i>rgsP</i> <sub>ΔEAL</sub>                                        | pABC- <i>rgsP</i> with deletion of <i>rgsP</i> (AA <sub>716-970</sub> )                                                                          | This work |
| pABC- <i>rgsP</i> <sub>ΔEAL</sub> - <i>egfp</i>                          | pABC- <i>rgsP</i> <sub>ΔEAL</sub> without <i>rgsP</i> stop codon                                                                                 | This work |
| pABC- <i>rgsP</i> <sub>ΔEAL</sub> - <i>3×flag</i>                        | pABC- <i>rgsP</i> <sub>ΔEAL</sub> - <i>egfp</i> carrying <i>3×flag</i> in place of <i>egfp</i>                                                   | This work |
| pABC- <i>rgsP</i> <sub>ΔGGDEF</sub>                                      | pABC- <i>rgsP</i> with deletion of <i>rgsP</i> (AA <sub>541-697</sub> )                                                                          | This work |
| pABC- <i>rgsP</i> <sub>ΔGGDEF</sub> - <i>egfp</i>                        | pABC- <i>rgsP</i> <sub>ΔGGDEF</sub> without <i>rgsP</i> stop codon                                                                               | This work |
| pABC- <i>rgsP</i> <sub>ΔGGDEF</sub> - <i>3×flag</i>                      | pABC- <i>rgsP</i> <sub>ΔGGDEF</sub> - <i>egfp</i> carrying <i>3×flag</i> in place of <i>egfp</i>                                                 | This work |
| pABC- <i>rgsP</i> <sub>ΔGGDEFΔEAL</sub>                                  | pABC- <i>rgsP</i> with deletion of <i>rgsP</i> (AA <sub>541-970</sub> )                                                                          | This work |
| pABC- <i>rgsP</i> <sub>ΔGGDEFΔEAL</sub> - <i>egfp</i>                    | pABC- <i>rgsP</i> <sub>ΔGGDEFΔEAL</sub> without <i>rgsP</i> stop codon                                                                           | This work |
| pABC- <i>rgsP</i> <sub>ΔGGDEFΔEAL</sub> - <i>3×flag</i>                  | pABC- <i>rgsP</i> <sub>ΔGGDEFΔEAL</sub> - <i>egfp</i> carrying <i>3×flag</i> in place of <i>egfp</i>                                             | This work |
| pABC- <i>rgsP</i> <sub>ΔPAS</sub>                                        | pABC- <i>rgsP</i> with deletion of <i>rgsP</i> (AA <sub>423-524</sub> )                                                                          | This work |
| pABC- <i>rgsP</i> <sub>ΔPAS</sub> - <i>egfp</i>                          | pABC- <i>rgsP</i> <sub>ΔPAS</sub> without <i>rgsP</i> stop codon                                                                                 | This work |
| pABC- <i>rgsP</i> <sub>ΔPAS</sub> - <i>3×flag</i>                        | pABC- <i>rgsP</i> <sub>ΔPAS</sub> - <i>egfp</i> carrying <i>3×flag</i> in place of <i>egfp</i>                                                   | This work |
| pABC- <i>rgsP</i> <sub>ΔPASΔGGDEFΔEAL</sub>                              | pABC- <i>rgsP</i> with deletion of <i>rgsP</i> (AA <sub>417-970</sub> )                                                                          | This work |
| pABC- <i>rgsP</i> <sub>ΔPASΔGGDEFΔEAL</sub> - <i>egfp</i>                | pABC- <i>rgsP</i> <sub>ΔPASΔGGDEFΔEAL</sub> without <i>rgsP</i> stop codon                                                                       | This work |
| pABC- <i>rgsP</i> <sub>ΔPASΔGGDEFΔEAL</sub> - <i>3×flag</i>              | pABC- <i>rgsP</i> <sub>ΔPASΔGGDEFΔEAL</sub> - <i>egfp</i> carrying <i>3×flag</i> in place of <i>egfp</i>                                         | This work |
| pABC- <i>rgsP</i> <sub>Δ7TMR-DISMED2</sub>                               | pABC- <i>rgsP</i> with deletion of <i>rgsP</i> (AA <sub>49-183</sub> )                                                                           | This work |
| pABC- <i>rgsP</i> <sub>Δ7TMR-DISMED2</sub> - <i>egfp</i>                 | pABC- <i>rgsP</i> <sub>Δ7TMR-DISMED2</sub> without <i>rgsP</i> stop codon                                                                        | This work |
| pABC- <i>rgsP</i> <sub>Δ7TMR-DISMED2</sub> - <i>3×flag</i>               | pABC- <i>rgsP</i> <sub>Δ7TMR-DISMED2</sub> - <i>egfp</i> carrying <i>3×flag</i> in place of <i>egfp</i>                                          | This work |
| pABC- <i>rgsP</i> <sub>Δ7TMR-DISMED2Δ7TMR-DISM_7TM</sub>                 | pABC- <i>rgsP</i> with deletion of <i>rgsP</i> (AA <sub>49-363</sub> )                                                                           | This work |
| pABC- <i>rgsP</i> <sub>Δ7TMR-DISMED2Δ7TMR-DISM_7TM</sub> - <i>egfp</i>   | pABC- <i>rgsP</i> <sub>Δ7TMR-DISMED2Δ7TMR-DISM_7TM</sub> without <i>rgsP</i> stop codon                                                          | This work |
| pABC- <i>rgsP</i> <sub>Δ7TMR-DISMED2Δ7TMR-DISM_7TM</sub> - <i>3×flag</i> | pABC- <i>rgsP</i> <sub>Δ7TMR-DISMED2Δ7TMR-DISM_7TM</sub> - <i>egfp</i> carrying <i>3×flag</i> in place of <i>egfp</i>                            | This work |
| pR- <i>rgsP</i>                                                          | pR- <i>egfp</i> carrying <i>rgsP</i> and 114 bp <i>rgsP</i> upstream region                                                                      | This work |
| pR- <i>rgsP-3×flag</i>                                                   | pR- <i>rgsP</i> without <i>rgsP</i> stop codon and carrying <i>3×flag</i>                                                                        | This work |
| pR- <i>rgsP</i> <sub>AAL</sub>                                           | pR- <i>rgsP</i> containing E746A mutation                                                                                                        | This work |
| pR- <i>rgsP</i> <sub>GAAAF</sub>                                         | pR- <i>rgsP</i> containing G619A, D620A and Q621A mutations                                                                                      | This work |
| pR- <i>rgsP</i> <sub>AXXA</sub>                                          | pR- <i>rgsP</i> containing R609A and D612A mutations                                                                                             | This work |
| pR- <i>rgsP</i> <sub>ΔEAL</sub>                                          | pR- <i>rgsP</i> with deletion of <i>rgsP</i> (AA <sub>716-970</sub> )                                                                            | This work |
| pR- <i>rgsP</i> <sub>ΔEAL</sub> - <i>3×flag</i>                          | pR- <i>rgsP</i> <sub>ΔEAL</sub> without <i>rgsP</i> stop codon and carrying <i>3×flag</i>                                                        | This work |
| pR- <i>rgsP</i> <sub>ΔGGDEF</sub>                                        | pR- <i>rgsP</i> with deletion of <i>rgsP</i> (AA <sub>541-697</sub> )                                                                            | This work |
| pR- <i>rgsP</i> <sub>ΔGGDEF</sub> - <i>3×flag</i>                        | pR- <i>rgsP</i> <sub>ΔGGDEF</sub> without <i>rgsP</i> stop codon and carrying <i>3×flag</i>                                                      | This work |
| pR- <i>rgsP</i> <sub>ΔGGDEFΔEAL</sub>                                    | pR- <i>rgsP</i> with deletion of <i>rgsP</i> (AA <sub>541-970</sub> )                                                                            | This work |
| pR- <i>rgsP</i> <sub>ΔGGDEFΔEAL</sub> - <i>3×flag</i>                    | pR- <i>rgsP</i> <sub>ΔGGDEFΔEAL</sub> without <i>rgsP</i> stop codon and carrying <i>3×flag</i>                                                  | This work |

|                                                                        |                                                                                                                             |           |
|------------------------------------------------------------------------|-----------------------------------------------------------------------------------------------------------------------------|-----------|
| pR- <i>rgsP</i> <sub>ΔPAS</sub>                                        | pR- <i>rgsP</i> with deletion of <i>rgsP</i> (AA423-524)                                                                    | This work |
| pR- <i>rgsP</i> <sub>ΔPAS</sub> -3× <i>flag</i>                        | pR- <i>rgsP</i> <sub>ΔPAS</sub> without <i>rgsP</i> stop codon and carrying 3× <i>flag</i>                                  | This work |
| pR- <i>rgsP</i> <sub>ΔPASΔGGDEFΔEAL</sub>                              | pR- <i>rgsP</i> with deletion of <i>rgsP</i> (AA423-970)                                                                    | This work |
| pR- <i>rgsP</i> <sub>ΔPASΔGGDEFΔEAL</sub> -3× <i>flag</i>              | pR- <i>rgsP</i> <sub>ΔPASΔGGDEFΔEAL</sub> without <i>rgsP</i> stop codon and carrying 3× <i>flag</i>                        | This work |
| pR- <i>rgsP</i> <sub>Δ7TMR-DISMED2</sub>                               | pR- <i>rgsP</i> with deletion of <i>rgsP</i> (AA49-183)                                                                     | This work |
| pR- <i>rgsP</i> <sub>Δ7TMR-DISMED2</sub> -3× <i>flag</i>               | pR- <i>rgsP</i> <sub>Δ7TMR-DISMED2</sub> without <i>rgsP</i> stop codon and carrying 3× <i>flag</i>                         | This work |
| pR- <i>rgsP</i> <sub>Δ7TMR-DISMED2Δ7TMR-DISM_7TM</sub>                 | pR- <i>rgsP</i> with deletion of <i>rgsP</i> (AA49-363)                                                                     | This work |
| pR- <i>rgsP</i> <sub>Δ7TMR-DISMED2Δ7TMR-DISM_7TM</sub> -3× <i>flag</i> | pR- <i>rgsP</i> <sub>Δ7TMR-DISMED2Δ7TMR-DISM_7TM</sub> without <i>rgsP</i> stop codon and carrying 3× <i>flag</i>           | This work |
| pR-P <sub>tau</sub> - <i>rgsP</i> <sub>At</sub>                        | pR-P <sub>tau</sub> carrying <i>Atu0784</i>                                                                                 | This work |
| pR-P <sub>tau</sub> - <i>rgsP</i> <sub>Re</sub>                        | pR-P <sub>tau</sub> carrying <i>RHE_CH00976</i>                                                                             | This work |
| pR-P <sub>tau</sub> - <i>rgsP</i> <sub>Sm</sub>                        | pR-P <sub>tau</sub> carrying <i>SMc00074</i>                                                                                | This work |
| pR-P <sub>tau</sub> - <i>rgsM</i> <sub>At</sub>                        | pR-P <sub>tau</sub> carrying <i>Atu4178</i>                                                                                 | This work |
| pR-P <sub>tau</sub> - <i>rgsM</i> <sub>Re</sub>                        | pR-P <sub>tau</sub> carrying <i>RHE_CH03752</i>                                                                             | This work |
| pR-P <sub>tau</sub> - <i>rgsM</i> <sub>Sm</sub>                        | pR-P <sub>tau</sub> carrying <i>SMc02432</i>                                                                                | This work |
| pSRKKm- <i>rgsM</i> - <i>phoA</i>                                      | pSRKKm carrying <i>rgsM</i> fused to <i>phoA</i> <sub>Ec</sub> (AA27-471)                                                   | This work |
| pSRKKm- <i>rgsM</i> <sub>1-66</sub> - <i>phoA</i>                      | pSRKKm carrying <i>rgsM</i> (AA1-66) fused to <i>phoA</i> <sub>Ec</sub> (AA27-471)                                          | This work |
| pSRKKm- <i>rgsM</i> <sub>60-646</sub> - <i>phoA</i>                    | pSRKKm carrying <i>rgsM</i> (AA60-646) fused to <i>phoA</i> <sub>Ec</sub> (AA27-471)                                        | This work |
| pWBT- <i>rgsM</i>                                                      | pWBT carrying <i>rgsM</i>                                                                                                   | This work |
| pWBT- <i>rgsM</i> -3× <i>flag</i>                                      | pWBT- <i>rgsM</i> without <i>rgsM</i> stop codon and carrying 3× <i>flag</i>                                                | This work |
| pWBT- <i>rgsM</i> <sub>H510A</sub>                                     | pWBT- <i>rgsM</i> containing H510A mutation                                                                                 | This work |
| pWBT- <i>rgsM</i> <sub>H510A</sub> -3× <i>flag</i>                     | pWBT- <i>rgsM</i> <sub>H510A</sub> without <i>rgsM</i> stop codon and carrying 3× <i>flag</i>                               | This work |
| pWH844- <i>rgsP</i> <sub>7TMR-DISMED2</sub>                            | pWH844 carrying <i>rgsP</i> (AA38-194)                                                                                      | This work |
| pWH844- <i>rgsP</i> <sub>PAS-GGDEF</sub>                               | pWH844 carrying <i>rgsP</i> (AA390-715)                                                                                     | This work |
| pWH844- <i>rgsP</i> <sub>PAS-GGDEF-EAL-AAL</sub>                       | pWH844- <i>SMc00074</i> <sub>390-970</sub> containing E746A mutation                                                        | This work |
| pWH844- <i>rgsM</i> <sub>57-646</sub>                                  | pWH844 carrying <i>rgsM</i> (AA57-646)                                                                                      | This work |
| pWH844- <i>rgsM</i> <sub>260-646</sub>                                 | pWH844 carrying <i>rgsM</i> (AA260-646)                                                                                     | This work |
| <b>Integrative plasmids</b>                                            |                                                                                                                             |           |
| pK18mob2- <i>pleD</i> - <i>egfp</i>                                    | pK18mob2- <i>egfp</i> carrying 3' portion of <i>pleD</i>                                                                    | [2]       |
| pG18mob- <i>rgsP</i> -3× <i>flag</i>                                   | pG18mob-3× <i>flag</i> carrying 3' portion of <i>rgsP</i>                                                                   | This work |
| pG18mob- <i>rgsM</i> -3× <i>flag</i>                                   | pG18mob-3× <i>flag</i> carrying 3' portion of <i>rgsM</i>                                                                   | This work |
| pK18mob2- <i>rgsP</i> - <i>egfp</i>                                    | pK18mob2- <i>egfp</i> carrying 3' portion of <i>rgsP</i>                                                                    | This work |
| pK18mob2- <i>rgsP</i> <sub>At</sub> - <i>egfp</i>                      | pK18mob2- <i>egfp</i> carrying 3' portion of <i>Atu0784</i>                                                                 | This work |
| pK18mob2- <i>rgsP</i> <sub>Re</sub> - <i>egfp</i>                      | pK18mob2- <i>egfp</i> carrying 3' portion of <i>RHE_CH00976</i>                                                             | This work |
| pK18mob2-P <sub>lac</sub> - <i>rgsM</i>                                | pK18mob2 carrying 5' portion of <i>rgsM</i>                                                                                 | This work |
| pK18mob2-P <sub>lac-T5</sub> - <i>rgsP</i>                             | pK18mob2 carrying T5 promoter, a Shine-Dalgarno sequence and 5' portion of <i>rgsP</i>                                      | This work |
| pK18mobsacB- <i>rgsP</i> -3× <i>flag</i>                               | pK18mobsacB carrying 3' portion of <i>rgsP</i> excluding the stop codon, 3× <i>flag</i> and <i>rgsP</i> downstream fragment | This work |
| pK18mobsacB- <i>rgsM</i> -3× <i>flag</i>                               | pK18mobsacB carrying 3' portion of <i>rgsM</i> excluding the stop codon, <i>mCherry</i> and <i>rgsM</i> downstream fragment | This work |
| pK18mobsacB- <i>rgsP</i> - <i>egfp</i>                                 | pK18mobsacB carrying 3' portion of <i>rgsP</i> excluding the stop codon, <i>egfp</i> and <i>rgsP</i> downstream fragment    | This work |
| pK18mobsacB- <i>rgsP</i> - <i>mCherry</i>                              | pK18mobsacB carrying 3' portion of <i>rgsP</i> excluding the stop codon, <i>mCherry</i> and <i>rgsP</i> downstream fragment | This work |
| pK18mobsacB- <i>mVenus</i> - <i>rgsM</i>                               | pK18mobsacB carrying 5' portion of <i>rgsM</i> excluding the start codon, <i>mVenus</i> and <i>rgsM</i> upstream fragment   | This work |
| pK18mobsacB-3× <i>flag</i> - <i>mucR</i>                               | pK18mobsacB carrying <i>mucR</i> excluding the start codon, 3× <i>flag</i> and <i>mucR</i> upstream fragment                | This work |
| pK19mob2ΩHMB- <i>rgsM</i>                                              | pK19mob2ΩHMB carrying internal portion of <i>rgsM</i>                                                                       | This work |

1. Casse F, Boucher C, Julliot J, Michel M, Dénarié J (1979) Identification and characterization of large plasmids in *Rhizobium meliloti* using agarose gel electrophoresis. *Microbiology* 113:229-242.
2. Schäper S, Krol E, Skotnicka D, Kaefer V, Hilker R, Søgaard-Andersen L, et al. (2016) Cyclic di-GMP regulates multiple cellular functions in the symbiotic Alphaproteobacterium *Sinorhizobium meliloti*. *J Bacteriol* 198:521-535. doi: 10.1128/JB.00795-15. PMID: 26574513
3. Hamilton RH, Fall MZ (1971) The loss of tumor-initiating ability in *Agrobacterium tumefaciens* by incubation at high temperature. *Experientia* 27:229-230. PMID: 5544763
4. Quinto C, De La Vega H, Flores M, Leemans J, Cevallos MA, Pardo MA, et al. (1985) Nitrogenase reductase: A functional multigene family in *Rhizobium phaseoli*. *Proc Natl Acad Sci U S A* 82:1170-1174. PMID: 16593543
5. Grant SG, Jessee J, Bloom FR, Hanahan D (1990) Differential plasmid rescue from transgenic mouse DNAs into *Escherichia coli* methylation-restriction mutants. *Proc Natl Acad Sci U S A* 87:4645-4649. PMID: 2162051
6. Simon R, Priefer U, Pühler A (1983) A broad host range mobilization system for in vivo genetic engineering: transposon mutagenesis in gram-negative bacteria. *Nature Biotechnology* 1:784-791
7. Karimova G, Pidoux J, Ullmann A, Ladant D (1998) A bacterial two-hybrid system based on a reconstituted

- signal transduction pathway. Proc Natl Acad Sci U S A 95:5752-5756. PubMed PMID: 9576956
8. Döhlemann J, Wagner M, Happel C, Carillo M, Sobetzko P, Erb TJ, et al. (2017) A family of single copy *repABC*-type shuttle vectors stably maintained in the alpha-proteobacterium *Sinorhizobium meliloti*. ACS Synth Biol. Epub 2017/03/06. doi: 10.1021/acssynbio.6b00320. PMID: 28264559
  9. Schäfer A, Tauch A, Jäger W, Kalinowski J, Thierbach G, Pühler A (1994) Small mobilizable multi-purpose cloning vectors derived from the *Escherichia coli* plasmids pK18 and pK19: selection of defined deletions in the chromosome of *Corynebacterium glutamicum*. Gene 145:69-73. PMID: 8045426.
  10. Luo L, Yao SY, Becker A, Rüberg S, Yu GQ, Zhu JB, et al. (2005) Two new *Sinorhizobium meliloti* LysR-type transcriptional regulators required for nodulation. J Bacteriol 187:4562-4572. doi: 10.1128/JB.187.13.4562-4572.2005. PMID: 15968067
  11. Torres-Quesada O, Millán V, Nisa-Martínez R, Bardou F, Crespi M, Toro N, et al. (2013) Independent activity of the homologous small regulatory RNAs AbcR1 and AbcR2 in the legume symbiont *Sinorhizobium meliloti*. PLoS One 8:e68147. doi: 10.1371/journal.pone.0068147. PMID: 23869210
  12. Khan SR, Gaines J, Roop RM, Farrand SK (2008) Broad-host-range expression vectors with tightly regulated promoters and their use to examine the influence of TraR and TraM expression on Ti plasmid quorum sensing. Appl Environ Microbiol 74:5053-5062. doi: 10.1128/AEM.01098-08. PMID: 18606801
  13. Schirmer F, Ehrt S, Hillen W (1997) Expression, inducer spectrum, domain structure, and function of MopR, the regulator of phenol degradation in *Acinetobacter calcoaceticus* NCIB8250. J Bacteriol 179:1329-1336. PMID: 9023219
  14. Skotnicka D, Smaldone GT, Petters T, Trampari E, Liang J, Kaeffer V, et al. (2016) A minimal threshold of c-di-GMP is essential for fruiting body formation and sporulation in *Myxococcus xanthus*. PLoS Genet 12:e1006080. doi: 10.1371/journal.pgen.1006080. PMID: 27214040
  15. Skotnicka D, Petters T, Heering J, Hoppert M, Kaeffer V, Søggaard-Andersen L (2016) Cyclic di-GMP regulates type IV pilus-dependent motility in *Myxococcus xanthus*. J Bacteriol 198:77-90. doi: 10.1128/JB.00281-15. PMID: 26124238
