# Supplementary material for: Seven-transmembrane receptor protein RgsP and cell wall-binding protein RgsM promote unipolar growth in Rhizobiales
Source: PubMed Central journal article supplement (PMC6107284; doi:10.1371/journal.pgen.1007594), 2018-08-13
Supplement: pgen.1007594.s024.pdf [file pgen.1007594.s024.pdf]

**S6 Table.** Oligonucleotides used in this study.

| Primer                               | Sequence                                              | Purpose                                                                                             |
|--------------------------------------|-------------------------------------------------------|-----------------------------------------------------------------------------------------------------|
| PrimJ_NotI_fwd                       | ATATGCGGCCGCTGAACGACATATTGTCCTCGCTGA                  |                                                                                                     |
| SMc00074_1243_Van91I_rev             | ATATCCAGCGCCTGGCGCTCGAGAT                             |                                                                                                     |
| RimJ_51_stop_fwd                     | TGACATTATCTGCTCCGCCTCCC                               |                                                                                                     |
| RimJ_51_stop_rev2                    | GGGAGGCGGAGCAGATAATGTCACCTGGCTGGCGATCTCGAC            |                                                                                                     |
| EGFP-Van91I-KpnI_fwd                 | ATATCCAGGCGCTGGCGCTGGGTACCAGCAAGGGCGAGGAGC<br>TGTT    |                                                                                                     |
| EGFP-ScaI_rev                        | ATATAGTACTTTACTTTGTACAGCTCGTCCATGC                    |                                                                                                     |
| EGFP-Van91I-Stop-KpnI_fwd            | ATATCCAGGCGCTGGCGCTGTGAGGTACCAGCAAGGGCGAGG<br>AGCTGTT | Construction of<br>pABC- <i>rgsP</i> and<br>its derivatives                                         |
| SMc00074_1243_Van91I_fwd             | ATATCCAGGCGCTGGCGCTCAC                                |                                                                                                     |
| SMc00074+stop_KpnI_rev               | ATATGGTACCTCAAGCCCCTTCATCAGCGGAAAT                    |                                                                                                     |
| SMc00074-nostop_KpnI_rev             | ATATGGTACCAGCCCCTTCATCAGCGGAAAT                       |                                                                                                     |
| SMc00074GGDEF+stop_KpnI_rev          | ATATGGTACCTCATTTCGAGCTGTAGGCGGTCC                     |                                                                                                     |
| SMc00074GGDEF-<br>nostop_KpnI_rev    | ATATGGTACCTTCGAGCTGTAGGCGGTCC                         |                                                                                                     |
| SMc00074PAS+stop_KpnI_rev            | ATATGGTACCTCACAGAAGCGCGTTGTGCAA                       |                                                                                                     |
| SMc00074PAS-nostop_KpnI_rev          | ATATGGTACCCAGAAGCGCGTTGTGCAA                          |                                                                                                     |
| SMc00074-full_-100_Bam_f             | ATATGGATCCTGAGCGTGAAGGCTATTTGAGA                      |                                                                                                     |
| SMc00074-full-Xba_r                  | ATATTCTAGATCAAGCCCCTTCATCAG                           |                                                                                                     |
| SMc00074_EAL-del_Xba_r               | ATATTCTAGATCATTTCGAGCTGTAGGCGGT                       | Construction of<br>pR- <i>rgsP</i> and<br>its derivatives                                           |
| SMc00074_GGDEF-EAL-del_Xba_r         | ATATTCTAGATCACAGAAGCGCGTTGTG                          |                                                                                                     |
| SMc00074_PAS-GGDEF-EAL-<br>del_Xba_r | ATATTCTAGATCAGGTATCGCCTGATCCC                         |                                                                                                     |
| SMc00074_E>A-f                       | GCGGCCCTCATGCGCTGGGA                                  | Generating <i>rgsP</i> <sub>AAL</sub>                                                               |
| SMc00074_E>A-r                       | AGCGCATGAGGGCCGCAAGCCGGCGATCTCGGCAT                   |                                                                                                     |
| SMc00074_GGDQF>GAAAF_f               | GCCGCGCCTTCGGCTTGATCCTCATGT                           | Generating <i>rgsP</i> <sub>GAAAF</sub>                                                             |
| SMc00074_GGDQF>GAAAF_r               | AGGATCAAGCCGAAGCCGCGGCCAAGACGCGGAGCGT                 |                                                                                                     |
| SMc00074_Isite>AxxA_f                | GCCCCGAGGCCACGCTCGCGCTCTTGGC                          | Generating <i>rgsP</i> <sub>AxxA</sub>                                                              |
| SMc00074_Isite>AxxA_r                | ACGCGGAGCGTGGCCTGCGGGCCAGAAGCCTGCGCAGGCG              |                                                                                                     |
| SMc00074_GGDEF-del_f                 | GAGCCGTTCCGTCGGCTTT                                   | Generating <i>rgsP</i> <sub>AGGDEF</sub>                                                            |
| SMc00074_GGDEF-del_r                 | GACGGAACGGCTCCAGAAGCGCGTTGTGCAA                       |                                                                                                     |
| SMc00074_PAS-del_f                   | ACCGAACAGCGCAATTCG                                    | Generating <i>rgsP</i> <sub>ΔPAS</sub>                                                              |
| SMc00074_PAS-del_r                   | TGCGTGTTCCGGTGTATCGCCTGATCCCCTGA                      |                                                                                                     |
| SMc00074_DISMED2-del_f               | GACGCTACAAGGATACCGT                                   | Generating <i>rgsP</i> <sub>Δ7TMR-DISMED2</sub>                                                     |
| SMc00074_DISMED2-del_r               | TCCTTGTAGGCGTCCGCGGTGTCTCGCGCGA                       |                                                                                                     |
| SMc00074_DISM-6TM-del_f              | ACCGGTCAACTCGCCAAT                                    | Generating <i>rgsP</i> <sub>Δ7TMR-DISMED2Δ7TMR-DISM_7TM</sub>                                       |
| SMc00074_DISM-6TM-del_r              | CGAGTTGACCGGTGCGCGGTGTCTCGCGCGA                       |                                                                                                     |
| SMc02432_H510A_fwd                   | GCCACCGCGCTGACTGGTCC                                  | Generating <i>rgsM</i> <sub>H510A</sub>                                                             |
| SMc02432_H510A_rev                   | GACCAGTCGACCGCGTGGCCATGCGCGAGAAGCCGAGGATA             |                                                                                                     |
| SMc00074-390_Bam_fwd                 | ATATGGATCCACCGTCATGACGACGCGCTTTT                      | Construction of<br>pWH844-RgsP <sub>PAS-GGDEF-EAL-AAL</sub> and<br>pWH844-RgsP <sub>PAS-GGDEF</sub> |
| SMc00074_Sal_rev                     | ATATGTCGACTCAAGCCCCTTCATCAG                           |                                                                                                     |
| SMc00074-715_Sal_rev                 | ATATGTCGACTCATTTCGAGCTGTAGGCGGTCC                     |                                                                                                     |
| SMc00074-38_Bam_fwd                  | ATATGGATCCGAGCCGTTGAAGATCTCG                          | Construction of<br>pWH844- <i>rgsP</i> <sub>7TMR-DISMED2</sub>                                      |
| SMc00074-194_+stop_Sall_rev          | ATATGTCGACTCAGGTGAAGCGTTGACGGTAT                      |                                                                                                     |

|                           |                                                                    |                                                                                                                                                 |
|---------------------------|--------------------------------------------------------------------|-------------------------------------------------------------------------------------------------------------------------------------------------|
| SMc02432_57_Xho_fwd       | ATATCTCGAGCTCGACGGCCGGCAGCAACT                                     | Construction of pWH844- <i>rgsM</i> <sup>57-646</sup>                                                                                           |
| SMc02432_Pst_rev          | ATATCTGCAGCTACTTGCTTGCACCTCGTT                                     |                                                                                                                                                 |
| SMc02432+778-BglII-f      | ATATAGATCTAAGCAGAGCATCGAATACGCC                                    | Construction of pWH844- <i>rgsM</i> <sup>260-646</sup>                                                                                          |
| SMc02432-stop-Pst         | TTGCCTGCAGCTACTTGCTTGCACCTCGTT                                     |                                                                                                                                                 |
| SMc02432-full-Xba-f       | ATATTCTAGAATGAGCAGCGATAAGAACATGC                                   | Construction of pWBT- <i>rgsM</i> and pWBT- <i>rgsM</i> <sub>H510A</sub>                                                                        |
| SMc02432-full-Kpn-r       | ATATGGTACCCTACTTGCTTGCACCTCGTT                                     |                                                                                                                                                 |
| SMc00074-TIR-RBS_Bam_f    | ATATGGATCCTGATTAACCTTTATAAGGAGGAAAAACATATGC<br>CCCTGACCCGTAAGC     | Construction of pR-P <sub>tau-<i>rgsP</i></sub> <sub>Sm</sub>                                                                                   |
| SMc00074-full-Xba_r       | ATATTCTAGATCAAGCCCGCTTCATCAG                                       |                                                                                                                                                 |
| RHE_CH00976-TIR-RBS_Bam_f | ATATGGATCCTGATTAACCTTTATAAGGAGGAAAAACATATGC<br>TGCCCAAGTCACCGT     | Construction of pR-P <sub>tau-<i>rgsP</i></sub> <sub>Re</sub>                                                                                   |
| RHE_CH00976-full_Xba_r    | ATATTCTAGATCAGGCCCTTTTCGTCAGCG                                     |                                                                                                                                                 |
| Atu0784-TIR-RBS_Bam_f     | ATATGGATCCTGATTAACCTTTATAAGGAGGAAAAACATATGA<br>CCTACAATCACACTGCGCC | Construction of pR-P <sub>tau-<i>rgsP</i></sub> <sub>At</sub>                                                                                   |
| Atu0784-full_Xba_r        | ATATTCTAGATCAAGACGCCCGCTTCGT                                       |                                                                                                                                                 |
| SMc02432-full-Xba-f       | ATATTCTAGAATGAGCAGCGATAAGAACATGC                                   | Construction of pR-P <sub>tau-<i>rgsM</i></sub> <sub>Sm</sub>                                                                                   |
| SMc02432-full-X-r         | ATATTCTAGACTACTTGCTTGCACCTCGTT                                     |                                                                                                                                                 |
| RHE_CH03752-TIR-RBS_Xba_f | ATATTCTAGATGATTAACCTTTATAAGGAGGAAAAACATATGA<br>TCCGCTCGCTGGGCAA    | Construction of pR-P <sub>tau-<i>rgsM</i></sub> <sub>Re</sub>                                                                                   |
| RHE_CH03752-full_Xba_r    | ATATTCTAGATTATTTGCTCGCCACCTGATCG                                   |                                                                                                                                                 |
| Atu4178-TIR-RBS_Bam_f     | ATATGGATCCTGATTAACCTTTATAAGGAGGAAAAACATATGA<br>CTGCGGATCGCAATGT    | Construction of pR-P <sub>tau-<i>rgsM</i></sub> <sub>At</sub>                                                                                   |
| Atu4178-full_Xba_r        | ATATTCTAGATCAGCGGCTCGCCACCTGAT                                     |                                                                                                                                                 |
| Psmc00074_Hind_fwd        | ATATAAGCTTCGGCGCTGCGCAGAACTG                                       | Construction of pSRKKm-P <sub>rgsP</sub> - <i>egfp</i> and pSRKKm-P <sub>rimj</sub> -P <sub>rgsP</sub> - <i>egfp</i>                            |
| Psmc00074_Xba_rev         | ATATTCTAGACAGGGGCATCAAAGGGGCAAAT                                   |                                                                                                                                                 |
| PrimJ_Hind_fwd            | ATATAAGCTTTGAACGACATATTGCTCCTCGCTGA                                |                                                                                                                                                 |
| SMc00074-C-Sall_fwd       | ATATGTCGACTTTCCTCGTATACCAGCCCA                                     | Construction of pK18mob2- <i>rgsP</i> - <i>egfp</i>                                                                                             |
| SMc00074-C-XbaI_rev       | ATATTCTAGAAGCCCGCTTCATCAGCGGAA                                     |                                                                                                                                                 |
| RHE_CH00976-C_Hind_f      | ATATAAGCTTCAGCTCGAAACCGATCTGCG                                     | Construction of pK18mob2- <i>rgsP</i> <sub>Re</sub> - <i>egfp</i>                                                                               |
| RHE_CH00976-C_Xba_r       | ATATTCTAGAGCCCTTTTCGTCAGCGGAAA                                     |                                                                                                                                                 |
| Atu0784-C_Sal_f           | ATATGTCGACGCAAGGAGCTGTCCCTCGCCTAT                                  | Construction of pK18mob2- <i>rgsP</i> <sub>At</sub> - <i>egfp</i>                                                                               |
| Atu0784-C_Xba_r           | ATATTCTAGAAGACGCCCGCTTCGTGCG                                       |                                                                                                                                                 |
| SMc00074-C-KpnI_fwd       | ATATGGTACCTTTCCTCGTATACCAGCCCA                                     | Construction of pG18mob- <i>rgsP</i> -3× <i>flag</i>                                                                                            |
| SMc00074-C-XbaI_rev       | ATATTCTAGAAGCCCGCTTCATCAGCGGAA                                     |                                                                                                                                                 |
| SMc02432-C717-EcoRI-f     | ATATGAATTCTTGGAAGCAATGTGCGACTT                                     | Construction of pG18mob- <i>rgsM</i> -3× <i>flag</i>                                                                                            |
| SMc02432-C738-XbaI-f      | ATATTCTAGACTTGCTTGCACCTCGTT                                        |                                                                                                                                                 |
| SMc00074-C-Sall_fwd       | ATATGTCGACTTTCCTCGTATACCAGCCCA                                     | Construction of pK18mobsacB- <i>rgsP</i> - <i>egfp</i> , pK18mobsacB- <i>rgsP</i> - <i>mCherry</i> and pK18mobsacB- <i>rgsP</i> -3× <i>flag</i> |
| mCh/egfp-Kpn-r            | GTACGGTACCTTACTTGTACAGCTCGTCCATG                                   |                                                                                                                                                 |
| SMc00074-763-r-K_f        | ATATGGTACCGGCATCTGCCCGTFCAG                                        |                                                                                                                                                 |
| SMc00074-763-r-S_r        | ATATCCCGGGATGGCGAAAAACGTGCTG                                       |                                                                                                                                                 |
| SMc02432-326-HindIII_fwd  | ATATAAGCTTGCAGGAGATCTCGATGCG                                       | Construction of pK19mob2ΩHMB- <i>rgsM</i>                                                                                                       |
| SMc02432-326-PstI_rev     | ATATCTGCAGACGTCTGATGGTTGGCGG                                       |                                                                                                                                                 |
| PT5-BamH-f                | ATATGGATCCCATATGCTTTCGTCTTCACCTC                                   | Construction of pK18mob2-P <sub>lac-T5</sub> - <i>rgsP</i> (pWBT- <i>SMc00074</i> used as PCR template)                                         |
| SMc00074-N584-Hind_r      | ATATAAGCTTACAGGGTGAAGGCGTTGA                                       |                                                                                                                                                 |
| PhoAEc+79-f-Xba           | GTGTTCTAGACCTGTTCTGGAAAACCGGG                                      | Construction of pSRKKm- <i>rgsM</i> - <i>phoA</i> ,                                                                                             |
| PhoAEcstop-r-Kpn          | TTCGGGTACCTTATTTTCAGCCCGAGCGGC                                     |                                                                                                                                                 |

|                                |                                              |                                                       |
|--------------------------------|----------------------------------------------|-------------------------------------------------------|
| SMc02432-full-N-f              | ATATCATATGAGCAGCGATAAGAACATGC                | pSRKKm- <i>rgsM</i> <sub>1-66</sub> - <i>phoA</i> and |
| SMc02432-C738-XbaI-f           | ATATTCTAGACTTGCTTGCGACCTCGTT                 | pSRKKm- <i>rgsM</i> <sub>60-646</sub> - <i>phoA</i>   |
| SMc02432+198-r-Xba             | GCCTCTAGACGGAATCGCCAGTTGCTGCCG               |                                                       |
| SMc02432+178-f-Nde             | GCCTCATATGCGGCAGCAACTGGCGATTCCG              |                                                       |
| EGFP/mCh-f-Nde                 | GAGTCATATGGTGAGCAAGGGCGAG                    |                                                       |
| EGFP/mCh-Xba-r-nostop          | GTA CTCTAGACTTG TACAGCTCGTCCATG              |                                                       |
| mVenus_Kpn_fwd                 | ATATGGTACCATGGTGAGCAAGGGCGAGGAG              |                                                       |
| SMc02432_-start_Xba_fwd        | ATATTCTAGAAGCAGCGATAAGAACATGCTTC             |                                                       |
| SMc02432_+750_Hind_rev         | ATATAAGCTTTCATGTTCTCTCGACGACGC               | Construction of                                       |
| SMc02432-768-l-B_f             | ATATGGATCCCCTCGACTTGCATGTGTAA                | pSRKGm- <i>mCherry</i> ,                              |
| SMc02432-768-l-K_r             | ATATGGTACCCTTTATCGCTGCATGCAGG                | pSRKGm- <i>mCherry-ftsZ</i> ,                         |
| SMc02432-774-r-K_f             | ATATGGTACCCACACAGCAACGGTATCG                 | pK18mobsacB- <i>mVenus-rgsM</i> and                   |
| SMc02432-774-r-S_r             | ATATCCGGGAGTACATGGAGAAGCATTCGGT              | pK18mobsacB- <i>rgsM-3×flag</i>                       |
| FtsZ+1-Xba-f                   | GAATCTAGAATGGCCATCAACTTGCAGAAG               |                                                       |
| FtsZ-end-Hind-r                | CGCGAAGCTTTCAGCTCGACTGGCGGCGC                |                                                       |
| N-Flag-mucR-XbaI_fwd           | ATATTCTAGAACAGAGACTTCGCTCGGTACG              |                                                       |
| N-Flag-mucR-HindIII_rev        | ATATAAGCTTTCACTTGCCGCGACGCTT                 | Construction of                                       |
| N-FLAG-mucR-454-left-EcoRI_fwd | ATATGAATTCATCCGTGATAGATCAGCTTCCC             | pK18mobsacB- <i>3×flag-mucR</i>                       |
| N-FLAG-mucR-454-left-NdeI_rev  | ATATCATATGTTCTTTCTCTATCGGAATCCAG             |                                                       |
| 3xFLAG_Kpn-blnt_oligo1         | CGATTACAAGGATCACGATGGTGATTACAAGGATCACGATAT   | Construction of                                       |
| 3xFLAG_Kpn-blnt_oligo2         | CGATTACAAGGATGACGATGACAAGTGA                 | pABC- <i>rgsP-3×flag</i> ,                            |
| FLAG_KpnI_rev                  | TCACTTGTCATCGTCATCCTTGTAAATCGATATCGTGATCCTTG | pR- <i>rgsP-3×flag</i> ,                              |
| SMc02432-C738-KpnI-r           | TAATCACCATCGTGATCCTTGTAAATCGGTAC             | pWBT- <i>rgsM-3×flag</i> ,                            |
| pUT18-Spe-f                    | ATATGGTACCTCACTTGTATCGTCATCCTTGTA            | pK18mobsacB- <i>rgsP-3×flag</i> ,                     |
| pUT18-Spe-r                    | ATATGGTACCCTTGCTTGCGACCTCGTT                 | pK18mobsacB- <i>rgsM-3×flag</i> and                   |
| SMc00074-XbaI_fwd              | GAACACTAGTATGACCATGATTACGCCAAG               | their derivatives                                     |
| SMc02432+1575-Kpn-+2-r         | CCTAACTAGTTTCTGTGTGAAATTGTTATCC              | Construction of                                       |
| SMc02432+3-Xba-f               | ATATTCTAGAATGCCCTGACCCGTAAG                  | pUT18Spe,                                             |
| SMc02432-end-r-Kpn             | TATAGGTACCGTGATGTCGTTGATGGTCCCG              | pUT18Spe- <i>rgsP</i> <sub>ΔGGDEFΔEAL</sub> ,         |
| SMc00074-seq-550               | TTCTCTAGAGAGCAGCGATAAGAACATGCTT              | pUT18C- <i>rgsM</i> and                               |
| SMc00074-seq-1146              | ATATGGTACCCTACTTGCTTGCGACCTCGTT              | pKT25- <i>rgsM</i>                                    |
| SMc00074-seq-1780              | ACGCCTACAAGGATAACCGTCA                       |                                                       |
| SMc02432_679                   | ATCGTGCTCCTGATCGGC                           |                                                       |
| RHE_CH00976_seq-395            | ACAATGTCCTCATCGCGCT                          |                                                       |
| RHE_CH00976_seq-1141           | TTCTATGTCGACCCGCAAC                          |                                                       |
| RHE_CH03752_seq-361            | GAGCGAAGGCTTTGCGCT                           |                                                       |
| Atu0784_seq-388                | CTGATCGGCTTACCCTCAT                          |                                                       |
| Atu0784_seq-1141               | AAGATGAGGCTGGCCGCCAA                         | Sequencing                                            |
| Atu4178_seq-371                | CAGCGCATCATCGCCATCA                          |                                                       |
| PCR1                           | GTGCTGATCGTGCTGCTGAT                         |                                                       |
| PCR2                           | CTCACGTCAAGATTCGGCTG                         |                                                       |
| egfp_rev                       | CGGGCCTCTTCGCTATT                            |                                                       |
|                                | TTAGCTCACTCATTAGG                            |                                                       |
|                                | ACTTCAGGGTCAGCTTGCCGTA                       |                                                       |

|         |                        |
|---------|------------------------|
| 405     | GATCCGGCAAACAAACCACC   |
| 456     | CGCTCTCCTGAGTAGGACAAA  |
| pQE_fwd | CGGATAACAATTCACACAG    |
| pQE_rev | CAAGCTAGCTTGGATTCTCACC |
| T25-r   | CCTCTTCGCTATTACGCCAGC  |
| T18-r   | CGGAGACGGTCACAGCTTGTC  |
| T18_fwd | AAAGCCTGTTCGACGATGG    |
| T25_fwd | TGACGGCGGATATCGACATGT  |

---
